# Supplementary material
Source: ML conference proceedings conference paper supplement (https://openreview.net/forum?id=fOrm2rGX2r)
Supplement: supplementary_material [file attachment]

# C-EVAL

---

C-Eval is a comprehensive Chinese evaluation suite designed to assess advanced knowledge and reasoning abilities of foundation models. It consists of 13948 multi-choice questions spanning 52 diverse disciplines and four difficulty levels.

## Dataset Link

[Github Repo](#)

[Official Website](#)

## Data Card Author(s)

- Yuzhen Huang

## Dataset Owners

### Team(s)

C-EVAL Team

### Contact Detail(s)

- **Dataset Owner(s):** C-EVAL Team
- **Affiliation:** Shanghai Jiao Tong University
- **Group Email:** [ceval.benchmark@gmail.com](mailto:ceval.benchmark@gmail.com)
- **Website:** <https://cevalbenchmark.com/>

### Author(s)

- Yuzhen Huang
- Yuzhuo Bai
- Zhihao Zhu
- Junlei Zhang
- Jinghan Zhang
- Tangjun Su
- Junteng Liu
- Chuancheng Lv
- Yikai Zhang
- Jiayi Lei
- Yao Fu

- Maosong Sun
- Junxian He

## Funding Sources

### Institution(s)

- Shanghai Jiao Tong University

### Funding or Grant Summary(ies)

N/A

## Dataset Overview

### Data Subject(s)

- Data about natural phenomena
- Data about places and objects

### Dataset Snapshot

| Category                    | Data   |
|-----------------------------|--------|
| Size of Dataset             | 3.5 MB |
| Number of Instances         | 13948  |
| Number of Fields            | 8      |
| Labeled Classes             | N/A    |
| Number of Labels            | N/A    |
| Average Labels Per Instance | N/A    |
| Algorithmic Labels          | N/A    |
| Human Labels                | N/A    |

### Content Description

Each datapoint in the dataset contains one multiple-choice question with four choices and its corresponding label. We randomly split datapoints into a development set, a validation set, and a test set within each subject. For development set, we provide explanations for each question. And we keep the labels of test set private to ensure the fair use of C-EVAL.

# Sensitivity of Data

N/A

## Dataset Version and Maintenance

### Maintenance Status

**Actively Maintained** - No new versions will be made available, but this dataset will be actively maintained, including but not limited to updates to the data.

### Version Details

**Current Version:** 1.0

**Last Updated:** 06/2023

**Release Date:** 05/2023

### Maintenance Plan

**Versioning:** N/A. C-EVAL is a static dataset. Minor releases correspond to any errors fixed in the dataset.

**Feedback:** For feedback, reach out to [ceval.benchmark@gmail.com](mailto:ceval.benchmark@gmail.com) or open an issue on our [Github Repo](#)

## Example of Data Points

---

### Primary Data Modality

- Text Data

### Sampling of Data Points

Explore C-EVAL on our [official website](#).

### Data Fields

| Field Name  | Field Value | Description                                          |
|-------------|-------------|------------------------------------------------------|
| id          | Integer     | the order number of the data point                   |
| question    | string      | the main body of multiple-choice question            |
| A           | string      | choice A for the question                            |
| B           | string      | choice B for the question                            |
| C           | string      | choice C for the question                            |
| D           | string      | choice D for the question                            |
| answer      | string      | the ground-truth answer of the question <sup>1</sup> |
| explanation | string      | the explanation of the question <sup>2</sup>         |

<sup>1</sup> For test set, we keep the answer private.

<sup>2</sup> Only the questions in the development set contain explanations.

### Typical Data Point

Below is a dev example from computer network:

```
id: 1
question: 25 °C时, 将pH=2的强酸溶液与pH=13的强碱溶液混合, 所得混合液的pH=11, 则强酸溶液与强碱溶液 的体积比是(忽略混合后溶液的体积变化)____
A: 11:1
B: 9:1
C: 1:11
D: 1:9
answer: B
explanation:
1. pH=13的强碱溶液中c(OH-)=0.1mol/L, pH=2的强酸溶液中c(H+)=0.01mol/L, 酸碱混合后pH=11, 即c(OH-)=0.001mol/L。
2. 设强酸和强碱溶液的体积分别为x和y, 则: c(OH-)=(0.1y-0.01x)/(x+y)=0.001, 解得x:y=9:1。
```

### Atypical Data Point

The dataset does not contain atypical data points as far as we know.

## Motivations & Intentions

# Motivations

## Purpose(s)

- Research

## Domain(s) of Application

Machine Learning, Natural Language Processing

## Motivating Factor(s)

- Evaluating the advanced abilities of foundation models in a Chinese context, one of the most widely spoken language in the world.
- Narrow the gap between Chinese large language model development and evaluation.

# Intended Use

## Dataset Use(s)

- Safe for research use

## Suitable Use Case(s)

- Search for better hyperparameter during training. For example, determine the optimal pre-train data mixing scheme.
- Assess advanced knowledge and reasoning abilities of foundation models in a Chinese context.

## Unsuitable Use Case(s)

- The dataset is created for model evaluation. It is not intended to be used as pre-training data.

# Citation Guidelines

## BiBTeX:

```
@article{huang2023ceval,  
title={C-Eval: A Multi-Level Multi-Discipline Chinese Evaluation Suite for Foundation Models},  
author={Huang, Yuzhen and Bai, Yuzhuo and Zhu, Zhihao and Zhang, Junlei and Zhang, Jinghan and Su, Tangjun and Liu, Junteng and Lv, Chuancheng and Zhang, Yikai and Lei, Jiayi and Fu, Yao and Sun, Maosong and He, Junxian},  
journal={arXiv preprint arXiv:2305.08322},  
year={2023}  
}
```

# Provenance

---

## Collection

### Method(s) Used

- Artificially Generated
- Scraped or Crawled
- Manually parsed

### Source Description(s)

- The primary source is mock exams freely available on the internet.
- A portion of the college-level questions are past exam questions from top universities in China, publicly shared by the students.
- A minor fraction of college questions are mock questions for the national graduate entrance exam, sourced from the Weipu website<sup>1</sup>. We have obtained their authorization to include around 2000 such questions into C-Eval.

<sup>1</sup> <https://kaoyan.cqvip.com/view/postgraduate/index.aspx>

## Collection Cadence

**Static:** Data was collected once from single or multiple sources.

## Data Processing

- All questions are subsequently parsed – automatically when possible, and otherwise manually by the authors – into a structured format.
- Convert complex mathematical notations into standard LATEX formats.
- Deduplication and cleaning
- Human validation

# Use in ML or AI Systems

## Dataset Use(s)

- Testing
- Validation
- Development or Production Use

## Usage Guideline(s)

Please visit our [Github Repo](#) for detailed information.

## Distribution(s)

| Set   | Number of data points |
|-------|-----------------------|
| Dev   | 260                   |
| Valid | 1346                  |
| Test  | 12342                 |

# Licenses

License CC BY-NC-SA 4.0

The C-Eval dataset is licensed under a [Creative Commons Attribution-NonCommercial-ShareAlike 4.0 International License](#).
